# Supplementary material
Source: PubMed Central journal article supplement (PMC4949121)
Supplement: NIHMS798986-supplement-SI.pdf [file NIHMS798986-supplement-SI.pdf]

## Supporting information

### A New Bifunctional Chelator p-SCN-PhPr-NE3TA for Copper-64: Synthesis, Peptidomimetic Conjugation, Radiolabeling and Evaluation for PET Imaging

Yongkang Gai,<sup>†‡Δ</sup> Lingyi Sun,<sup>†Δ</sup> Wenqi Hui,<sup>§</sup> Qin Ouyang,<sup>§</sup> Carolyn J. Anderson,<sup>‡#</sup> Guangya Xiang,<sup>†\*</sup> Xiang Ma,<sup>†\*</sup> Dexing Zeng<sup>†\*</sup>

<sup>†</sup>School of Pharmacy, Tongji Medical College, Huazhong University of Science and Technology, 13 Hangkong Road, Wuhan 430030, China

<sup>‡</sup>Department of Radiology, University of Pittsburgh, 100 Technology Drive, Suite 452D, Pittsburgh, PA 15219, United States

<sup>#</sup>Departments of Pharmacology & Chemical Biology and Bioengineering, University of Pittsburgh, Pittsburgh, PA 15219, United States

<sup>§</sup>College of Pharmacy, The Third Military Medical University, Chongqing 400038, China

<sup>Δ</sup>These authors contributed equally to this work.

#### Corresponding authors:

Guangya Xiang: [gyxiang1968@hotmail.com](mailto:gyxiang1968@hotmail.com)

Xiang Ma: [xiangma@hust.edu.cn](mailto:xiangma@hust.edu.cn)

Dexing Zeng: [zengd@upmc.edu](mailto:zengd@upmc.edu)

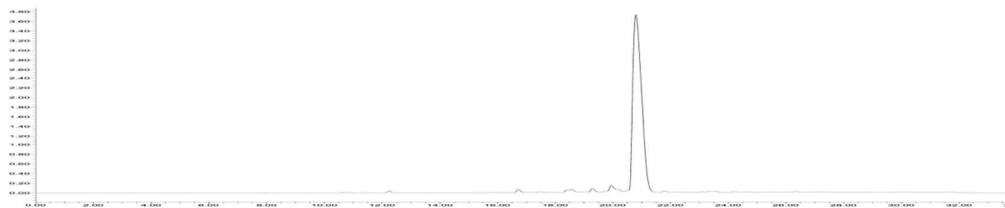

**Figure S1.** HPLC spectra of *p*-SCN-PhPr-NE3TA (Eluting condition: 0~2 min 0%B, 2~22 min from 0%B to 50%B, 22~23 min from 50%B to 90%B, 23~28 min 90%B, 28~29 min from 90%B to 0%B, 29~34 min 0%B)

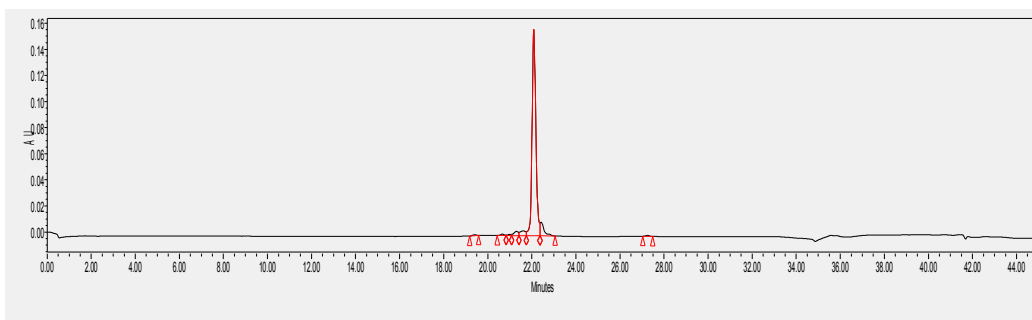

**Figure S2.** HPLC spectra of NE3TA-PEG<sub>4</sub>-LLP2A

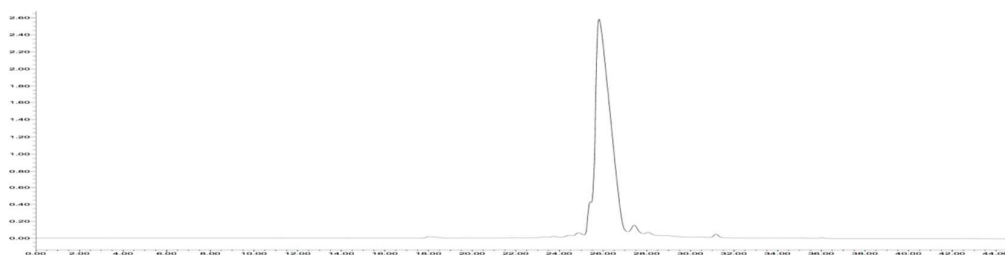

**Figure S3.** HPLC spectra of NOTA-PEG<sub>4</sub>-LLP2A

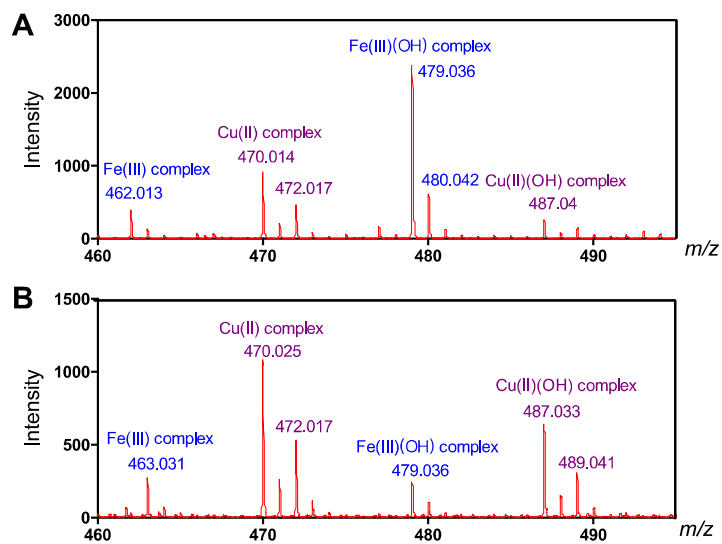

**Figure S4.** MS spectra of cold labeling solutions. Labeling conditions: A). *p*-NH<sub>2</sub>-Bn-NOTA, Cu(II) and Fe(III) were mixed at molar ratios 6:1:1 in 0.1 M pH 4 NH<sub>4</sub>OAc buffer and incubated at 70 °C for 30 min. B).

*p*-NH<sub>2</sub>-Bn-NOTA, Cu(II) and Fe(III) were mixed at molar ratios 1:1:10 in 0.1 M pH 4 NH<sub>4</sub>OAc buffer and incubated at room temperature for 30 min

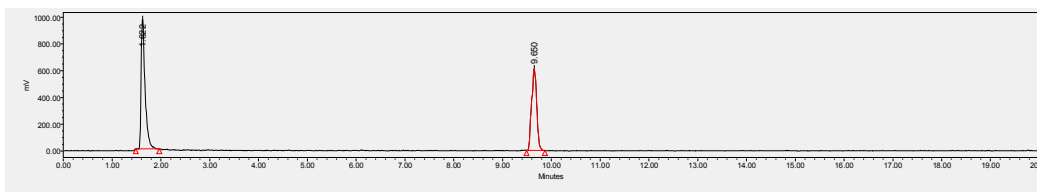

**Figure S5.** Labeling result of 100 pmol NOTA-PEG<sub>4</sub>-LLP2A with 400 μCi <sup>64</sup>Cu in 0.1 M NH<sub>4</sub>OAc buffer (pH 4.0) after incubation at 37 °C for 30 min

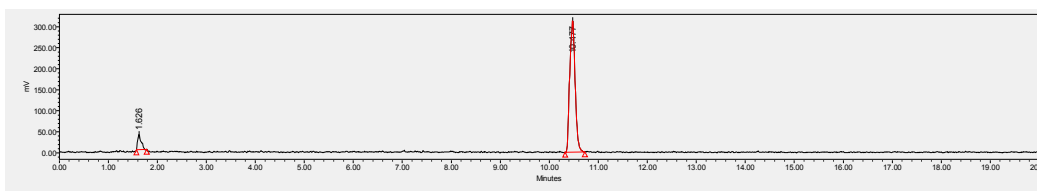

**Figure S6.** Labeling result of 100 pmol NE3TA-PEG<sub>4</sub>-LLP2A with 400 μCi <sup>64</sup>Cu in 0.1 M NH<sub>4</sub>OAc buffer (pH 4.0) after incubation at 37 °C for 30 min

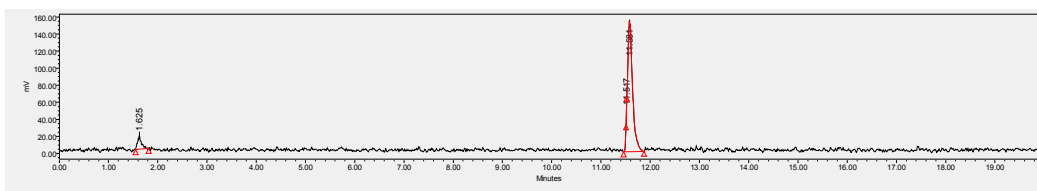

**Figure S7.** Radio-HPLC spectra of <sup>64</sup>Cu-NOTA-LLP2A after incubation in human serum at 37°C for 24 hrs

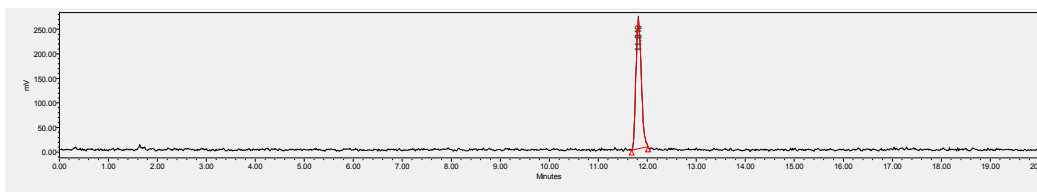

**Figure S8.** Radio-HPLC spectra of <sup>64</sup>Cu-NOTA-LLP2A after incubation in human serum at 37°C for 24 hrs

#### DFT Computational method.

All calculations were performed using Gaussian09 suite of program.<sup>1</sup> Density functional theory method was used, employing uB3LYP hybrid functional.<sup>2</sup> Geometry optimization was done using a combined basis set 6-31+G(d,p). Frequency calculation was done at the same level of theory as geometry optimization, to confirm the stationary

points to be minima. Single point energy calculations were done using B3LYP method at a larger basis set 6-311++G(d,p). Solvent effect was accounted for using self-consistent reaction field (SCRF) method, using SMD model and UAKS radii.<sup>3</sup> Water was used as the solvent.

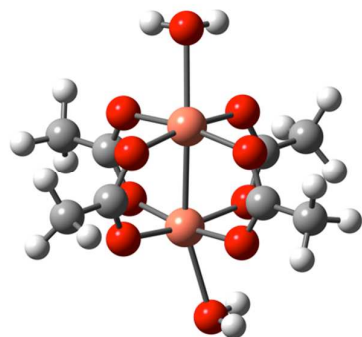

$\text{Cu}_2(\text{OAc})_4(\text{H}_2\text{O})_2$

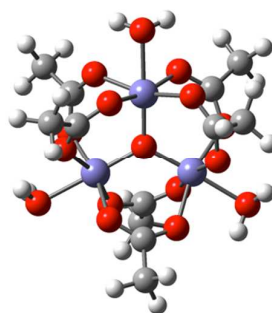

$\text{Fe}_3(\mu\text{-O})(\text{OAc})_6(\text{H}_2\text{O})_3$

DFT computation data:

a): Our developed *p*-SCN-PhPr-NETA and the targeting probe conjugated tracer

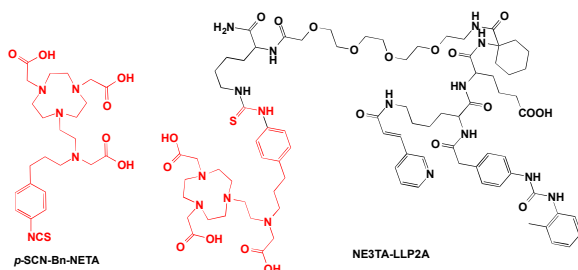

Fe NE3TA-LLP2A\_1.log

|                                              |                  |
|----------------------------------------------|------------------|
| Zero-point correction=                       | 0.634229 (A. U.) |
| Thermal correction to Energy=                | 0.670301         |
| Thermal correction to Enthalpy=              | 0.671245         |
| Thermal correction to Gibbs Free Energy=     | 0.567699         |
| Sum of electronic and zero-point Energies=   | -3416.183938     |
| Sum of electronic and thermal Energies=      | -3416.147867     |
| Sum of electronic and thermal Enthalpies=    | -3416.146922     |
| Sum of electronic and thermal Free Energies= | -3416.250468     |

SCF Done: E(UB3LYP)= -3417.43827010 A.U.

---

| Center | Atomic | Atomic | Coordinates (Angstroms) |           |           |
|--------|--------|--------|-------------------------|-----------|-----------|
| Number | Number | Type   | X                       | Y         | Z         |
| 1      | 26     | 0      | 1.796126                | 0.482227  | 0.285898  |
| 2      | 7      | 0      | 3.444227                | 0.944231  | -0.804507 |
| 3      | 7      | 0      | 1.158409                | 2.364957  | -0.127103 |
| 4      | 6      | 0      | 2.392784                | 3.177493  | -0.323683 |
| 5      | 6      | 0      | 3.353920                | 2.389961  | -1.220357 |
| 6      | 7      | 0      | 0.913371                | -0.077344 | -1.519462 |
| 7      | 6      | 0      | 1.986306                | 0.014638  | -2.574182 |
| 8      | 6      | 0      | 3.406184                | 0.026975  | -1.974642 |
| 9      | 6      | 0      | 0.324809                | 2.359211  | -1.378552 |
| 10     | 6      | 0      | -0.156814               | 0.955835  | -1.714993 |
| 11     | 6      | 0      | 2.300611                | -3.673784 | 0.142953  |
| 12     | 6      | 0      | 2.944910                | -2.306349 | 0.431716  |
| 13     | 8      | 0      | 4.177385                | -2.209686 | 0.424278  |
| 14     | 8      | 0      | 2.082635                | -1.357357 | 0.617533  |
| 15     | 6      | 0      | 4.573731                | 0.752680  | 0.155404  |
| 16     | 6      | 0      | 4.110905                | 1.218300  | 1.544467  |
| 17     | 8      | 0      | 4.907695                | 1.587830  | 2.388799  |
| 18     | 8      | 0      | 2.799456                | 1.189265  | 1.710539  |
| 19     | 6      | 0      | -0.383097               | 1.516096  | 1.607189  |
| 20     | 6      | 0      | 0.362013                | 2.750938  | 1.077017  |
| 21     | 8      | 0      | 0.158618                | 0.380043  | 1.298281  |
| 22     | 8      | 0      | -1.410976               | 1.664926  | 2.271437  |
| 23     | 6      | 0      | -0.181954               | -3.766053 | 0.361238  |
| 24     | 6      | 0      | -1.369372               | -4.434854 | -0.352941 |
| 25     | 6      | 0      | -3.197671               | -2.913443 | 0.548178  |
| 26     | 6      | 0      | -3.681263               | -2.228369 | -0.575921 |
| 27     | 6      | 0      | 0.167296                | -1.403531 | -1.545571 |

|    |    |   |           |           |           |
|----|----|---|-----------|-----------|-----------|
| 28 | 6  | 0 | 0.893170  | -2.780209 | -1.669975 |
| 29 | 7  | 0 | 0.997703  | -3.647969 | -0.498528 |
| 30 | 6  | 0 | -2.701116 | -4.340127 | 0.431308  |
| 31 | 6  | 0 | -3.084764 | -2.192631 | 1.745185  |
| 32 | 6  | 0 | -3.960104 | -0.860816 | -0.536973 |
| 33 | 7  | 0 | -3.838846 | 1.277358  | 0.720827  |
| 34 | 6  | 0 | -4.341811 | 2.121611  | -0.233391 |
| 35 | 6  | 0 | -3.374179 | -0.831666 | 1.808105  |
| 36 | 6  | 0 | -3.775134 | -0.143368 | 0.654663  |
| 37 | 16 | 0 | -3.505237 | 3.508851  | -0.737313 |
| 38 | 7  | 0 | -5.557287 | 1.819800  | -0.758682 |
| 39 | 6  | 0 | -6.583940 | 0.988268  | -0.134694 |
| 40 | 1  | 0 | 2.833363  | 3.356686  | 0.655644  |
| 41 | 1  | 0 | 2.156194  | 4.148916  | -0.777779 |
| 42 | 1  | 0 | 3.019374  | 2.429438  | -2.258547 |
| 43 | 1  | 0 | 4.350296  | 2.843359  | -1.192702 |
| 44 | 1  | 0 | 1.815523  | 0.925001  | -3.154943 |
| 45 | 1  | 0 | 1.898431  | -0.816493 | -3.280710 |
| 46 | 1  | 0 | 3.695781  | -0.960036 | -1.614270 |
| 47 | 1  | 0 | 4.128879  | 0.329768  | -2.746338 |
| 48 | 1  | 0 | 0.925175  | 2.768804  | -2.193956 |
| 49 | 1  | 0 | -0.547234 | 3.010680  | -1.254959 |
| 50 | 1  | 0 | -0.975779 | 0.680417  | -1.050715 |
| 51 | 1  | 0 | -0.540073 | 0.926808  | -2.744315 |
| 52 | 1  | 0 | 3.020152  | -4.219589 | -0.481023 |
| 53 | 1  | 0 | 2.229518  | -4.224319 | 1.086576  |
| 54 | 1  | 0 | 5.468731  | 1.300191  | -0.156977 |
| 55 | 1  | 0 | 4.788207  | -0.318186 | 0.232114  |
| 56 | 1  | 0 | 1.055949  | 3.069797  | 1.857820  |
| 57 | 1  | 0 | -0.342204 | 3.557650  | 0.855913  |
| 58 | 1  | 0 | 0.104707  | -4.392482 | 1.212827  |
| 59 | 1  | 0 | -0.484590 | -2.800023 | 0.791800  |
| 60 | 1  | 0 | -1.525693 | -3.975913 | -1.337214 |

|    |   |   |           |           |           |
|----|---|---|-----------|-----------|-----------|
| 61 | 1 | 0 | -1.122449 | -5.486583 | -0.542151 |
| 62 | 1 | 0 | -3.805868 | -2.760474 | -1.516824 |
| 63 | 1 | 0 | -0.501283 | -1.328178 | -2.413959 |
| 64 | 1 | 0 | -0.458770 | -1.395910 | -0.654654 |
| 65 | 1 | 0 | 1.898850  | -2.666190 | -2.086778 |
| 66 | 1 | 0 | 0.326610  | -3.319539 | -2.441001 |
| 67 | 1 | 0 | -2.572472 | -4.769541 | 1.432639  |
| 68 | 1 | 0 | -3.448078 | -4.959933 | -0.080418 |
| 69 | 1 | 0 | -2.723445 | -2.692950 | 2.639854  |
| 70 | 1 | 0 | -4.275897 | -0.348897 | -1.440311 |
| 71 | 1 | 0 | -3.070389 | 1.675882  | 1.267268  |
| 72 | 1 | 0 | -3.212965 | -0.279763 | 2.727228  |
| 73 | 1 | 0 | -5.852206 | 2.474375  | -1.469915 |
| 74 | 1 | 0 | -7.561155 | 1.430192  | -0.343496 |
| 75 | 1 | 0 | -6.433700 | 0.958749  | 0.947089  |
| 76 | 1 | 0 | -6.571035 | -0.039449 | -0.513199 |

-----

Cu NE3TA-LLP2A.log

Zero-point correction= 0.628669 (A. U.)  
 Thermal correction to Energy= 0.666748  
 Thermal correction to Enthalpy= 0.667692  
 Thermal correction to Gibbs Free Energy= 0.557194  
 Sum of electronic and zero-point Energies= -3792.968606  
 Sum of electronic and thermal Energies= -3792.930527  
 Sum of electronic and thermal Enthalpies= -3792.929583  
 Sum of electronic and thermal Free Energies= -3793.040081

SCF Done: E(UB3LYP) = -3794.33561533 A.U.

Standard orientation:

-----

| Center<br>Number | Atomic<br>Number | Atomic<br>Type | Coordinates (Angstroms) |           |           |
|------------------|------------------|----------------|-------------------------|-----------|-----------|
|                  |                  |                | X                       | Y         | Z         |
| 1                | 29               | 0              | 1.864671                | -0.525582 | -0.649212 |
| 2                | 7                | 0              | 3.736981                | -1.037863 | 0.880439  |
| 3                | 7                | 0              | 1.264090                | -2.311425 | 0.330628  |
| 4                | 6                | 0              | 2.458043                | -3.157093 | 0.564197  |
| 5                | 6                | 0              | 3.519458                | -2.398988 | 1.382617  |
| 6                | 7                | 0              | 1.230480                | 0.444240  | 1.735201  |
| 7                | 6                | 0              | 2.393535                | 0.213073  | 2.619137  |
| 8                | 6                | 0              | 3.748846                | 0.008578  | 1.902378  |
| 9                | 6                | 0              | 0.558424                | -2.025973 | 1.619038  |
| 10               | 6                | 0              | 0.164271                | -0.568788 | 1.876009  |
| 11               | 6                | 0              | 2.470997                | 3.579508  | -0.499888 |
| 12               | 6                | 0              | 2.971084                | 2.161252  | -0.859214 |
| 13               | 8                | 0              | 4.194268                | 1.954450  | -0.835730 |
| 14               | 8                | 0              | 2.028930                | 1.325486  | -1.127891 |
| 15               | 6                | 0              | 4.832652                | -0.984040 | -0.099159 |
| 16               | 6                | 0              | 4.442509                | -1.628763 | -1.452222 |
| 17               | 8                | 0              | 5.322888                | -2.217859 | -2.093214 |
| 18               | 8                | 0              | 3.211326                | -1.488657 | -1.810461 |
| 19               | 6                | 0              | -0.642296               | -1.826066 | -1.179783 |
| 20               | 6                | 0              | 0.341463                | -2.901536 | -0.669947 |
| 21               | 8                | 0              | -0.181600               | -0.638206 | -1.196173 |
| 22               | 8                | 0              | -1.779839               | -2.200900 | -1.535664 |
| 23               | 6                | 0              | -0.006529               | 3.563461  | -0.404650 |
| 24               | 6                | 0              | -1.142749               | 4.342563  | 0.276336  |
| 25               | 6                | 0              | -3.074754               | 2.865516  | -0.529746 |
| 26               | 6                | 0              | -3.791543               | 2.348262  | 0.559764  |
| 27               | 6                | 0              | 0.591114                | 1.760368  | 1.962541  |
| 28               | 6                | 0              | 1.342773                | 3.082408  | 1.647357  |
| 29               | 7                | 0              | 1.264815                | 3.678102  | 0.309162  |
| 30               | 6                | 0              | -2.488172               | 4.261614  | -0.485649 |



|    |    |   |           |           |           |
|----|----|---|-----------|-----------|-----------|
| 31 | 6  | 0 | -2.844527 | 2.012698  | -1.618503 |
| 32 | 6  | 0 | -4.223540 | 1.020687  | 0.586663  |
| 33 | 7  | 0 | -4.237340 | -1.219392 | -0.473450 |
| 34 | 6  | 0 | -5.209702 | -1.858176 | 0.229728  |
| 35 | 6  | 0 | -3.273173 | 0.687788  | -1.611232 |
| 36 | 6  | 0 | -3.954446 | 0.174875  | -0.499805 |
| 37 | 16 | 0 | -5.010375 | -3.420983 | 0.851742  |
| 38 | 7  | 0 | -6.399225 | -1.198478 | 0.417104  |
| 39 | 6  | 0 | -6.981846 | -0.232494 | -0.513818 |
| 40 | 1  | 0 | 2.858318  | -3.424449 | -0.413494 |
| 41 | 1  | 0 | 2.180022  | -4.085884 | 1.089555  |
| 42 | 1  | 0 | 3.218779  | -2.353436 | 2.434012  |
| 43 | 1  | 0 | 4.453992  | -2.981385 | 1.357250  |
| 44 | 1  | 0 | 2.188391  | -0.641630 | 3.277615  |
| 45 | 1  | 0 | 2.523867  | 1.069802  | 3.295221  |
| 46 | 1  | 0 | 4.033521  | 0.934254  | 1.397284  |
| 47 | 1  | 0 | 4.505862  | -0.181862 | 2.690444  |
| 48 | 1  | 0 | 1.183279  | -2.388250 | 2.437638  |
| 49 | 1  | 0 | -0.365534 | -2.616917 | 1.659829  |
| 50 | 1  | 0 | -0.625178 | -0.291748 | 1.176726  |
| 51 | 1  | 0 | -0.271410 | -0.543472 | 2.896043  |
| 52 | 1  | 0 | 3.297261  | 4.080025  | 0.018668  |
| 53 | 1  | 0 | 2.304201  | 4.129045  | -1.434506 |
| 54 | 1  | 0 | 5.740058  | -1.482194 | 0.275829  |
| 55 | 1  | 0 | 5.050048  | 0.064675  | -0.317375 |
| 56 | 1  | 0 | 0.940847  | -3.237244 | -1.522549 |
| 57 | 1  | 0 | -0.208818 | -3.758226 | -0.260320 |
| 58 | 1  | 0 | 0.151161  | 3.992557  | -1.401440 |
| 59 | 1  | 0 | -0.296044 | 2.517963  | -0.576799 |
| 60 | 1  | 0 | -1.301607 | 3.974562  | 1.298752  |
| 61 | 1  | 0 | -0.840820 | 5.394405  | 0.367774  |
| 62 | 1  | 0 | -3.991293 | 2.984285  | 1.420235  |
| 63 | 1  | 0 | 0.303980  | 1.824414  | 3.032057  |

|    |   |   |           |           |           |
|----|---|---|-----------|-----------|-----------|
| 64 | 1 | 0 | -0.344368 | 1.756014  | 1.399938  |
| 65 | 1 | 0 | 2.402098  | 2.992133  | 1.910903  |
| 66 | 1 | 0 | 0.921290  | 3.805155  | 2.364144  |
| 67 | 1 | 0 | -2.342265 | 4.629850  | -1.509805 |
| 68 | 1 | 0 | -3.200309 | 4.945807  | -0.005848 |
| 69 | 1 | 0 | -2.281633 | 2.375854  | -2.474180 |
| 70 | 1 | 0 | -4.741925 | 0.633312  | 1.458230  |
| 71 | 1 | 0 | -3.444446 | -1.795513 | -0.792341 |
| 72 | 1 | 0 | -3.024464 | 0.023307  | -2.430486 |
| 73 | 1 | 0 | -7.048918 | -1.767276 | 0.941021  |
| 74 | 1 | 0 | -8.069328 | -0.339865 | -0.479583 |
| 75 | 1 | 0 | -6.643810 | -0.425176 | -1.537094 |
| 76 | 1 | 0 | -6.722022 | 0.799538  | -0.257494 |

-----

Cu NE3TA-LLP2A\_1.log

Zero-point correction= 0.628357 (A. U.)  
 Thermal correction to Energy= 0.666729  
 Thermal correction to Enthalpy= 0.667673  
 Thermal correction to Gibbs Free Energy= 0.555371  
 Sum of electronic and zero-point Energies= -3792.961220  
 Sum of electronic and thermal Energies= -3792.922848  
 Sum of electronic and thermal Enthalpies= -3792.921904  
 Sum of electronic and thermal Free Energies= -3793.034206

SCF Done: E(UB3LYP)= -3794.34056876 A.U.

-----

| Center<br>Number | Atomic<br>Number | Atomic<br>Type | Coordinates (Angstroms) |          |           |
|------------------|------------------|----------------|-------------------------|----------|-----------|
|                  |                  |                | X                       | Y        | Z         |
| 1                | 29               | 0              | 2.591326                | 0.420761 | 0.428636  |
| 2                | 7                | 0              | 4.686250                | 0.617885 | -0.150737 |

-----

|    |   |   |           |           |           |
|----|---|---|-----------|-----------|-----------|
| 3  | 7 | 0 | 2.404787  | 2.080626  | -0.864585 |
| 4  | 6 | 0 | 3.651316  | 2.855635  | -0.652867 |
| 5  | 6 | 0 | 4.883316  | 1.947234  | -0.793503 |
| 6  | 7 | 0 | 2.812641  | -0.809948 | -2.114761 |
| 7  | 6 | 0 | 4.246990  | -0.619590 | -2.328237 |
| 8  | 6 | 0 | 5.072599  | -0.505572 | -1.027712 |
| 9  | 6 | 0 | 2.250548  | 1.687694  | -2.296096 |
| 10 | 6 | 0 | 1.893361  | 0.226659  | -2.596034 |
| 11 | 6 | 0 | 0.903545  | -2.436774 | 1.045530  |
| 12 | 6 | 0 | 2.329144  | -2.306096 | 1.618795  |
| 13 | 8 | 0 | 2.762706  | -3.219110 | 2.332025  |
| 14 | 8 | 0 | 3.009861  | -1.251011 | 1.307083  |
| 15 | 6 | 0 | 5.374488  | 0.567682  | 1.167567  |
| 16 | 6 | 0 | 4.736057  | 1.566814  | 2.179157  |
| 17 | 8 | 0 | 5.499393  | 2.071015  | 3.020672  |
| 18 | 8 | 0 | 3.483346  | 1.757295  | 2.025352  |
| 19 | 6 | 0 | 0.145385  | 1.756265  | 0.181212  |
| 20 | 6 | 0 | 1.203685  | 2.762458  | -0.319786 |
| 21 | 8 | 0 | 0.616315  | 0.626486  | 0.579817  |
| 22 | 8 | 0 | -1.042477 | 2.104467  | 0.200854  |
| 23 | 6 | 0 | -0.503707 | -2.102019 | -0.952200 |
| 24 | 6 | 0 | -1.521921 | -3.230004 | -0.623739 |
| 25 | 6 | 0 | -3.444823 | -1.872045 | 0.418520  |
| 26 | 6 | 0 | -4.748569 | -2.173592 | -0.007104 |
| 27 | 6 | 0 | 2.298938  | -2.158286 | -2.411630 |
| 28 | 6 | 0 | 1.800989  | -2.961420 | -1.192373 |
| 29 | 7 | 0 | 0.842453  | -2.221835 | -0.396533 |
| 30 | 6 | 0 | -2.422125 | -2.973979 | 0.615069  |
| 31 | 6 | 0 | -3.120887 | -0.520211 | 0.621173  |
| 32 | 6 | 0 | -5.696083 | -1.173077 | -0.231582 |
| 33 | 7 | 0 | -6.281014 | 1.226872  | -0.286781 |
| 34 | 6 | 0 | -7.634126 | 1.233258  | -0.102436 |
| 35 | 6 | 0 | -4.058347 | 0.489626  | 0.402492  |

|    |    |   |           |           |           |
|----|----|---|-----------|-----------|-----------|
| 36 | 6  | 0 | -5.352340 | 0.167577  | -0.017401 |
| 37 | 16 | 0 | -8.652869 | 2.129443  | -1.118149 |
| 38 | 7  | 0 | -8.142433 | 0.521029  | 0.941563  |
| 39 | 6  | 0 | -7.443705 | 0.173879  | 2.179948  |
| 40 | 1  | 0 | 3.612138  | 3.251631  | 0.360177  |
| 41 | 1  | 0 | 3.721748  | 3.692475  | -1.367644 |
| 42 | 1  | 0 | 5.128878  | 1.801249  | -1.848976 |
| 43 | 1  | 0 | 5.744447  | 2.456503  | -0.343329 |
| 44 | 1  | 0 | 4.427487  | 0.252514  | -2.969247 |
| 45 | 1  | 0 | 4.664339  | -1.472834 | -2.882353 |
| 46 | 1  | 0 | 4.933211  | -1.415423 | -0.438064 |
| 47 | 1  | 0 | 6.140976  | -0.434937 | -1.302267 |
| 48 | 1  | 0 | 3.171822  | 1.954617  | -2.820388 |
| 49 | 1  | 0 | 1.459190  | 2.299825  | -2.749551 |
| 50 | 1  | 0 | 0.918710  | 0.009131  | -2.153173 |
| 51 | 1  | 0 | 1.768385  | 0.177016  | -3.699431 |
| 52 | 1  | 0 | 0.536549  | -3.428306 | 1.356435  |
| 53 | 1  | 0 | 0.283381  | -1.665722 | 1.516951  |
| 54 | 1  | 0 | 6.444775  | 0.788903  | 1.052985  |
| 55 | 1  | 0 | 5.249068  | -0.440114 | 1.570807  |
| 56 | 1  | 0 | 1.515810  | 3.334381  | 0.558998  |
| 57 | 1  | 0 | 0.758629  | 3.452297  | -1.047631 |
| 58 | 1  | 0 | -0.908900 | -1.136196 | -0.634827 |
| 59 | 1  | 0 | -0.402736 | -2.043556 | -2.041638 |
| 60 | 1  | 0 | -2.178863 | -3.381413 | -1.490981 |
| 61 | 1  | 0 | -0.982238 | -4.175017 | -0.478013 |
| 62 | 1  | 0 | -5.028258 | -3.211451 | -0.176346 |
| 63 | 1  | 0 | 3.082230  | -2.753620 | -2.902660 |
| 64 | 1  | 0 | 1.486474  | -2.073888 | -3.149129 |
| 65 | 1  | 0 | 2.661117  | -3.200055 | -0.562181 |
| 66 | 1  | 0 | 1.415865  | -3.933489 | -1.569025 |
| 67 | 1  | 0 | -1.795286 | -2.738838 | 1.480064  |
| 68 | 1  | 0 | -2.949200 | -3.906154 | 0.855622  |

|    |   |   |           |           |           |
|----|---|---|-----------|-----------|-----------|
| 69 | 1 | 0 | -2.127599 | -0.222604 | 0.942556  |
| 70 | 1 | 0 | -6.693610 | -1.428077 | -0.576823 |
| 71 | 1 | 0 | -5.985803 | 1.900293  | -0.982705 |
| 72 | 1 | 0 | -3.761441 | 1.523282  | 0.553135  |
| 73 | 1 | 0 | -9.148466 | 0.591730  | 0.987391  |
| 74 | 1 | 0 | -8.178271 | 0.162241  | 2.988930  |
| 75 | 1 | 0 | -6.678715 | 0.919130  | 2.414545  |
| 76 | 1 | 0 | -6.962717 | -0.806902 | 2.123570  |

b) commercialized *p*-SCN-Bn-NOTA and the targeting probe conjugated tracer

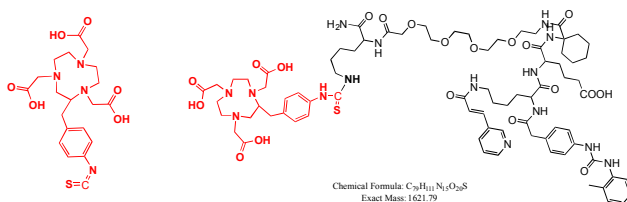

Fe NOTA-LLP2A.log

|                                              |               |
|----------------------------------------------|---------------|
| Zero-point correction=                       | 0.499759 A.U. |
| Thermal correction to Energy=                | 0.531055      |
| Thermal correction to Enthalpy=              | 0.531999      |
| Thermal correction to Gibbs Free Energy=     | 0.435549      |
| Sum of electronic and zero-point Energies=   | -3203.706484  |
| Sum of electronic and thermal Energies=      | -3203.675188  |
| Sum of electronic and thermal Enthalpies=    | -3203.674244  |
| Sum of electronic and thermal Free Energies= | -3203.770694  |

SCF Done: E(UB3LYP) = -3204.80914077 A.U.

| Center Number | Atomic Number | Atomic Type | Coordinates (Angstroms) |          |          |
|---------------|---------------|-------------|-------------------------|----------|----------|
|               |               |             | X                       | Y        | Z        |
| 1             | 26            | 0           | -2.792179               | 0.181909 | 0.353724 |

|    |   |   |           |           |           |
|----|---|---|-----------|-----------|-----------|
| 2  | 7 | 0 | -1.311218 | 1.364421  | -0.317640 |
| 3  | 7 | 0 | -3.650108 | 0.440273  | -1.452422 |
| 4  | 6 | 0 | -2.899902 | 1.459903  | -2.246922 |
| 5  | 6 | 0 | -1.958684 | 2.256766  | -1.337246 |
| 6  | 7 | 0 | -1.740165 | -1.338996 | -0.475006 |
| 7  | 6 | 0 | -0.291314 | -0.894889 | -0.405601 |
| 8  | 6 | 0 | -0.191993 | 0.556972  | -0.887870 |
| 9  | 6 | 0 | -3.595417 | -0.920745 | -2.086093 |
| 10 | 6 | 0 | -2.224440 | -1.570598 | -1.871147 |
| 11 | 6 | 0 | -1.998419 | -2.442261 | 0.496809  |
| 12 | 6 | 0 | -1.828025 | -1.845469 | 1.915268  |
| 13 | 8 | 0 | -1.478139 | -2.554606 | 2.845941  |
| 14 | 8 | 0 | -2.046940 | -0.556614 | 1.960310  |
| 15 | 6 | 0 | -0.976352 | 2.158950  | 0.904749  |
| 16 | 6 | 0 | -2.313840 | 2.572564  | 1.566175  |
| 17 | 8 | 0 | -2.375557 | 3.572315  | 2.260902  |
| 18 | 8 | 0 | -3.310921 | 1.769830  | 1.273221  |
| 19 | 6 | 0 | -5.464759 | -0.187850 | 0.068786  |
| 20 | 6 | 0 | -5.052698 | 0.778273  | -1.074459 |
| 21 | 8 | 0 | -4.443124 | -0.725645 | 0.694702  |
| 22 | 8 | 0 | -6.643010 | -0.414768 | 0.280136  |
| 23 | 1 | 0 | -3.594446 | 2.137536  | -2.754805 |
| 24 | 1 | 0 | -2.336502 | 0.941864  | -3.027899 |
| 25 | 1 | 0 | -1.194964 | 2.780792  | -1.926342 |
| 26 | 1 | 0 | -2.530994 | 3.007598  | -0.792587 |
| 27 | 1 | 0 | -0.058669 | -0.896322 | 0.659992  |
| 28 | 1 | 0 | 0.775833  | 0.980821  | -0.603637 |
| 29 | 1 | 0 | -0.247910 | 0.605569  | -1.980443 |
| 30 | 1 | 0 | -3.824739 | -0.849334 | -3.157632 |
| 31 | 1 | 0 | -4.368386 | -1.529634 | -1.619255 |
| 32 | 1 | 0 | -2.282054 | -2.641809 | -2.092117 |
| 33 | 1 | 0 | -1.494779 | -1.146745 | -2.564435 |
| 34 | 1 | 0 | -3.033138 | -2.772749 | 0.378735  |

|    |    |   |           |           |           |
|----|----|---|-----------|-----------|-----------|
| 35 | 1  | 0 | -0.371264 | 3.039649  | 0.662922  |
| 36 | 1  | 0 | -0.425887 | 1.516879  | 1.597391  |
| 37 | 1  | 0 | -5.074476 | 1.802965  | -0.694920 |
| 38 | 1  | 0 | -5.741729 | 0.684285  | -1.921451 |
| 39 | 6  | 0 | 2.590113  | -1.792996 | 0.596534  |
| 40 | 6  | 0 | 2.145668  | -1.546265 | -0.710782 |
| 41 | 6  | 0 | 3.064686  | -1.019620 | -1.627775 |
| 42 | 6  | 0 | 4.380598  | -0.729625 | -1.266696 |
| 43 | 6  | 0 | 4.802823  | -0.949390 | 0.050886  |
| 44 | 6  | 0 | 3.896485  | -1.491849 | 0.974723  |
| 45 | 1  | 0 | 1.914099  | -2.216853 | 1.335338  |
| 46 | 1  | 0 | 2.756390  | -0.840899 | -2.655410 |
| 47 | 1  | 0 | 5.069679  | -0.327059 | -1.996390 |
| 48 | 1  | 0 | 4.211902  | -1.672563 | 1.999449  |
| 49 | 6  | 0 | 0.710449  | -1.837425 | -1.108398 |
| 50 | 1  | 0 | 0.615148  | -1.759929 | -2.197746 |
| 51 | 1  | 0 | 0.461575  | -2.870800 | -0.841047 |
| 52 | 6  | 0 | 6.985989  | 0.321017  | 0.155041  |
| 53 | 7  | 0 | 6.127332  | -0.715164 | 0.482884  |
| 54 | 1  | 0 | 6.382450  | -1.240827 | 1.310088  |
| 55 | 7  | 0 | 8.217758  | 0.162337  | 0.716365  |
| 56 | 1  | 0 | 8.460867  | -0.749937 | 1.079011  |
| 57 | 16 | 0 | 6.589883  | 1.652974  | -0.780342 |
| 58 | 6  | 0 | 9.307292  | 1.115575  | 0.555668  |
| 59 | 1  | 0 | 8.998188  | 2.105496  | 0.898407  |
| 60 | 1  | 0 | 10.147932 | 0.769373  | 1.161051  |
| 61 | 1  | 0 | 9.617187  | 1.198599  | -0.491539 |
| 62 | 1  | 0 | -1.326008 | -3.293598 | 0.353017  |

Zero-point correction= 0.496847 (A. U.)  
 Thermal correction to Energy= 0.529312  
 Thermal correction to Enthalpy= 0.530256  
 Thermal correction to Gibbs Free Energy= 0.431157  
 Sum of electronic and zero-point Energies= -3580.326950  
 Sum of electronic and thermal Energies= -3580.294485  
 Sum of electronic and thermal Enthalpies= -3580.293540  
 Sum of electronic and thermal Free Energies= -3580.392639

SCF Done: E(UB3LYP) = -3581.49414691 A.U.

Standard orientation:

| -----  |        |        |                         |           |           |  |
|--------|--------|--------|-------------------------|-----------|-----------|--|
| Center | Atomic | Atomic | Coordinates (Angstroms) |           |           |  |
| Number | Number | Type   | X                       | Y         | Z         |  |
| -----  |        |        |                         |           |           |  |
| 1      | 29     | 0      | 2.863782                | 0.337470  | -0.383645 |  |
| 2      | 7      | 0      | 1.250529                | 1.199021  | 0.350050  |  |
| 3      | 7      | 0      | 3.569994                | 0.244622  | 1.572382  |  |
| 4      | 6      | 0      | 2.692139                | 1.120854  | 2.399862  |  |
| 5      | 6      | 0      | 1.806938                | 1.993117  | 1.507542  |  |
| 6      | 7      | 0      | 1.675734                | -1.637714 | 0.404061  |  |
| 7      | 6      | 0      | 0.286109                | -1.162576 | 0.277200  |  |
| 8      | 6      | 0      | 0.163866                | 0.267241  | 0.821476  |  |
| 9      | 6      | 0      | 3.555880                | -1.182544 | 1.989544  |  |
| 10     | 6      | 0      | 2.201286                | -1.889666 | 1.739352  |  |
| 11     | 6      | 0      | 2.109225                | -2.505172 | -0.690809 |  |
| 12     | 6      | 0      | 2.001941                | -1.768606 | -2.050716 |  |
| 13     | 8      | 0      | 1.775912                | -2.417908 | -3.066438 |  |
| 14     | 8      | 0      | 2.109762                | -0.470121 | -2.023437 |  |
| 15     | 6      | 0      | 0.819236                | 2.120965  | -0.747056 |  |
| 16     | 6      | 0      | 2.060991                | 2.847364  | -1.336795 |  |



|    |   |   |           |           |           |
|----|---|---|-----------|-----------|-----------|
| 17 | 8 | 0 | 1.880440  | 3.846880  | -2.021912 |
| 18 | 8 | 0 | 3.193977  | 2.313021  | -1.012553 |
| 19 | 6 | 0 | 5.481629  | 0.091210  | 0.050608  |
| 20 | 6 | 0 | 4.949277  | 0.741925  | 1.340755  |
| 21 | 8 | 0 | 4.543066  | -0.295120 | -0.798895 |
| 22 | 8 | 0 | 6.667140  | -0.077929 | -0.152156 |
| 23 | 1 | 0 | 3.295802  | 1.759134  | 3.055393  |
| 24 | 1 | 0 | 2.090275  | 0.483349  | 3.051251  |
| 25 | 1 | 0 | 0.974295  | 2.423318  | 2.079358  |
| 26 | 1 | 0 | 2.393790  | 2.806936  | 1.086394  |
| 27 | 1 | 0 | 0.089507  | -1.111629 | -0.795309 |
| 28 | 1 | 0 | -0.803716 | 0.691928  | 0.540208  |
| 29 | 1 | 0 | 0.192769  | 0.248899  | 1.914762  |
| 30 | 1 | 0 | 3.817821  | -1.261418 | 3.055155  |
| 31 | 1 | 0 | 4.339552  | -1.687804 | 1.421651  |
| 32 | 1 | 0 | 2.353636  | -2.961092 | 1.936539  |
| 33 | 1 | 0 | 1.470047  | -1.554717 | 2.480827  |
| 34 | 1 | 0 | 3.158740  | -2.778707 | -0.540606 |
| 35 | 1 | 0 | 0.088465  | 2.843786  | -0.367429 |
| 36 | 1 | 0 | 0.355008  | 1.518929  | -1.532384 |
| 37 | 1 | 0 | 4.911022  | 1.823650  | 1.179763  |
| 38 | 1 | 0 | 5.615316  | 0.524575  | 2.183401  |
| 39 | 6 | 0 | -2.661164 | -1.818139 | -0.789866 |
| 40 | 6 | 0 | -2.204342 | -1.722699 | 0.533272  |
| 41 | 6 | 0 | -3.103480 | -1.255355 | 1.501420  |
| 42 | 6 | 0 | -4.408070 | -0.881115 | 1.178345  |
| 43 | 6 | 0 | -4.840362 | -0.951444 | -0.152228 |
| 44 | 6 | 0 | -3.955216 | -1.430898 | -1.130221 |
| 45 | 1 | 0 | -2.002795 | -2.192577 | -1.570028 |
| 46 | 1 | 0 | -2.788360 | -1.193807 | 2.540668  |
| 47 | 1 | 0 | -5.080938 | -0.529288 | 1.948182  |
| 48 | 1 | 0 | -4.278712 | -1.496419 | -2.166350 |
| 49 | 6 | 0 | -0.782251 | -2.104458 | 0.891921  |

|    |    |   |            |           |           |
|----|----|---|------------|-----------|-----------|
| 50 | 1  | 0 | -0.678411  | -2.133169 | 1.983626  |
| 51 | 1  | 0 | -0.566479  | -3.116362 | 0.528169  |
| 52 | 6  | 0 | -6.995746  | 0.374061  | -0.108223 |
| 53 | 7  | 0 | -6.156477  | -0.631789 | -0.554955 |
| 54 | 1  | 0 | -6.425029  | -1.059311 | -1.432794 |
| 55 | 7  | 0 | -8.228178  | 0.308346  | -0.687311 |
| 56 | 1  | 0 | -8.486575  | -0.546943 | -1.161058 |
| 57 | 16 | 0 | -6.580737  | 1.577928  | 0.980512  |
| 58 | 6  | 0 | -9.300339  | 1.255933  | -0.414884 |
| 59 | 1  | 0 | -8.975595  | 2.273366  | -0.644085 |
| 60 | 1  | 0 | -10.148283 | 0.995036  | -1.052068 |
| 61 | 1  | 0 | -9.606228  | 1.224390  | 0.636257  |
| 62 | 1  | 0 | 1.528289   | -3.435518 | -0.771419 |

c) commercialized NODAGA and the targeting probe conjugated tracer

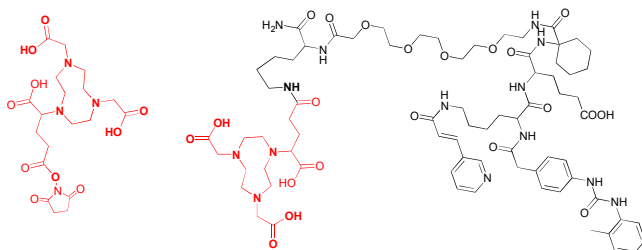

Fe NODAGA-LLP2A\_2.log 0 2

# opt freq ub3lyp/6-31+g(d,p)

Zero-point correction= 0.433927 (A. U.)  
 Thermal correction to Energy= 0.459870  
 Thermal correction to Enthalpy= 0.460814  
 Thermal correction to Gibbs Free Energy= 0.378385  
 Sum of electronic and zero-point Energies= -2633.711125  
 Sum of electronic and thermal Energies= -2633.685182  
 Sum of electronic and thermal Enthalpies= -2633.684238

Sum of electronic and thermal Free Energies= -2633.766667

SCF Done: E(UB3LYP)= -2634.66989594 A.U.

---

| Center | Atomic | Atomic | Coordinates (Angstroms) |           |           |
|--------|--------|--------|-------------------------|-----------|-----------|
| Number | Number | Type   | X                       | Y         | Z         |
| 1      | 26     | 0      | 1.095655                | 0.076921  | -0.301686 |
| 2      | 7      | 0      | 1.014254                | 1.507687  | 1.113360  |
| 3      | 7      | 0      | 2.241662                | -0.939156 | 0.984939  |
| 4      | 6      | 0      | 2.576970                | -0.109137 | 2.181912  |
| 5      | 6      | 0      | 2.290086                | 1.365688  | 1.888479  |
| 6      | 7      | 0      | -0.508056               | -0.774070 | 0.609604  |
| 7      | 6      | 0      | -1.203740               | 0.381613  | 1.282935  |
| 8      | 6      | 0      | -0.193122               | 1.301058  | 1.972074  |
| 9      | 6      | 0      | 1.435227                | -2.156149 | 1.342339  |
| 10     | 6      | 0      | -0.032428               | -1.792847 | 1.597072  |
| 11     | 6      | 0      | -1.254874               | -1.303448 | -0.590423 |
| 12     | 6      | 0      | -1.288290               | -0.121742 | -1.608164 |
| 13     | 8      | 0      | -2.191951               | -0.039221 | -2.436256 |
| 14     | 8      | 0      | -0.298763               | 0.710079  | -1.479217 |
| 15     | 6      | 0      | 1.035866                | 2.769894  | 0.319576  |
| 16     | 6      | 0      | 2.091012                | 2.581082  | -0.794687 |
| 17     | 8      | 0      | 2.651456                | 3.540119  | -1.295226 |
| 18     | 8      | 0      | 2.311292                | 1.318881  | -1.080885 |
| 19     | 6      | 0      | 2.809152                | -1.807852 | -1.240377 |
| 20     | 6      | 0      | 3.392990                | -1.333841 | 0.115457  |
| 21     | 8      | 0      | 1.623903                | -1.306513 | -1.507285 |
| 22     | 8      | 0      | 3.430665                | -2.592986 | -1.934332 |
| 23     | 1      | 0      | 3.626418                | -0.244834 | 2.464867  |
| 24     | 1      | 0      | 1.974022                | -0.461988 | 3.023111  |
| 25     | 1      | 0      | 2.242520                | 1.948635  | 2.817712  |

|    |   |   |           |           |           |
|----|---|---|-----------|-----------|-----------|
| 26 | 1 | 0 | 3.090553  | 1.780069  | 1.275238  |
| 27 | 1 | 0 | -1.943580 | 0.035427  | 2.009432  |
| 28 | 1 | 0 | -1.736491 | 0.935925  | 0.512945  |
| 29 | 1 | 0 | -0.667990 | 2.258878  | 2.210606  |
| 30 | 1 | 0 | 0.133531  | 0.869281  | 2.922180  |
| 31 | 1 | 0 | 1.869760  | -2.655352 | 2.218096  |
| 32 | 1 | 0 | 1.500812  | -2.848376 | 0.503024  |
| 33 | 1 | 0 | -0.649544 | -2.695249 | 1.550362  |
| 34 | 1 | 0 | -0.160114 | -1.379734 | 2.600941  |
| 35 | 1 | 0 | -0.563778 | -2.016842 | -1.054009 |
| 36 | 1 | 0 | 1.274985  | 3.639552  | 0.941567  |
| 37 | 1 | 0 | 0.055731  | 2.908265  | -0.143063 |
| 38 | 1 | 0 | 4.016028  | -0.452568 | -0.058695 |
| 39 | 1 | 0 | 3.995540  | -2.125009 | 0.575078  |
| 40 | 6 | 0 | -2.585136 | -2.059759 | -0.388343 |
| 41 | 6 | 0 | -3.642559 | -1.587250 | 0.627886  |
| 42 | 6 | 0 | -4.301410 | -0.205594 | 0.533269  |
| 43 | 1 | 0 | -3.020335 | -2.120112 | -1.391838 |
| 44 | 1 | 0 | -2.346419 | -3.095689 | -0.117514 |
| 45 | 1 | 0 | -4.471537 | -2.305624 | 0.575791  |
| 46 | 1 | 0 | -3.268076 | -1.664157 | 1.652641  |
| 47 | 8 | 0 | -4.702083 | 0.344145  | 1.565879  |
| 48 | 7 | 0 | -4.485171 | 0.323934  | -0.698151 |
| 49 | 6 | 0 | -5.134639 | 1.618183  | -0.865663 |
| 50 | 1 | 0 | -3.929859 | -0.023396 | -1.477149 |
| 51 | 1 | 0 | -5.254486 | 1.808330  | -1.933228 |
| 52 | 1 | 0 | -6.114496 | 1.610888  | -0.382539 |
| 53 | 1 | 0 | -4.545836 | 2.429560  | -0.421441 |

Zero-point correction= 0.429392 (A. U.)  
 Thermal correction to Energy= 0.456733  
 Thermal correction to Enthalpy= 0.457677  
 Thermal correction to Gibbs Free Energy= 0.371758  
 Sum of electronic and zero-point Energies= -3010.505613  
 Sum of electronic and thermal Energies= -3010.478273  
 Sum of electronic and thermal Enthalpies= -3010.477328  
 Sum of electronic and thermal Free Energies= -3010.563247

SCF Done: E(UB3LYP) = -3011.57535573 A.U.

| -----  |        |        |                         |           |           |
|--------|--------|--------|-------------------------|-----------|-----------|
| Center | Atomic | Atomic | Coordinates (Angstroms) |           |           |
| Number | Number | Type   | X                       | Y         | Z         |
| -----  |        |        |                         |           |           |
| 1      | 29     | 0      | 1.337416                | 0.143897  | -0.529070 |
| 2      | 7      | 0      | 1.138031                | 1.433707  | 1.141217  |
| 3      | 7      | 0      | 2.097263                | -1.229132 | 1.014324  |
| 4      | 6      | 0      | 2.412865                | -0.435078 | 2.220528  |
| 5      | 6      | 0      | 2.349446                | 1.072847  | 1.928167  |
| 6      | 7      | 0      | -0.791326               | -0.739374 | 0.685531  |
| 7      | 6      | 0      | -1.238175               | 0.518812  | 1.277014  |
| 8      | 6      | 0      | -0.099192               | 1.299361  | 1.957390  |
| 9      | 6      | 0      | 1.099337                | -2.293132 | 1.241301  |
| 10     | 6      | 0      | -0.312101               | -1.769021 | 1.592780  |
| 11     | 6      | 0      | -1.423952               | -1.183344 | -0.564368 |
| 12     | 6      | 0      | -1.388647               | -0.016837 | -1.612483 |
| 13     | 8      | 0      | -2.372891               | 0.130254  | -2.369459 |
| 14     | 8      | 0      | -0.329832               | 0.685945  | -1.623590 |
| 15     | 6      | 0      | 1.293243                | 2.777560  | 0.525744  |
| 16     | 6      | 0      | 2.446138                | 2.790182  | -0.520438 |
| 17     | 8      | 0      | 2.947434                | 3.890092  | -0.784844 |
| 18     | 8      | 0      | 2.755702                | 1.639902  | -0.994231 |

|    |   |   |           |           |           |
|----|---|---|-----------|-----------|-----------|
| 19 | 6 | 0 | 2.892015  | -2.034233 | -1.203852 |
| 20 | 6 | 0 | 3.270914  | -1.734452 | 0.271716  |
| 21 | 8 | 0 | 1.930310  | -1.309877 | -1.679413 |
| 22 | 8 | 0 | 3.512574  | -2.914749 | -1.801122 |
| 23 | 1 | 0 | 3.411701  | -0.683899 | 2.605015  |
| 24 | 1 | 0 | 1.706915  | -0.701236 | 3.012659  |
| 25 | 1 | 0 | 2.383049  | 1.640423  | 2.872525  |
| 26 | 1 | 0 | 3.214831  | 1.360395  | 1.329860  |
| 27 | 1 | 0 | -2.033753 | 0.392021  | 2.031496  |
| 28 | 1 | 0 | -1.656888 | 1.132698  | 0.479010  |
| 29 | 1 | 0 | -0.474107 | 2.294097  | 2.231860  |
| 30 | 1 | 0 | 0.162401  | 0.806903  | 2.899102  |
| 31 | 1 | 0 | 1.432809  | -2.982221 | 2.037804  |
| 32 | 1 | 0 | 1.043277  | -2.873697 | 0.317158  |
| 33 | 1 | 0 | -0.980391 | -2.645275 | 1.622533  |
| 34 | 1 | 0 | -0.317076 | -1.368138 | 2.612370  |
| 35 | 1 | 0 | -0.732108 | -1.912181 | -1.010580 |
| 36 | 1 | 0 | 1.475193  | 3.545928  | 1.290036  |
| 37 | 1 | 0 | 0.361573  | 3.015302  | 0.003004  |
| 38 | 1 | 0 | 4.036618  | -0.951311 | 0.260341  |
| 39 | 1 | 0 | 3.699590  | -2.635492 | 0.733555  |
| 40 | 6 | 0 | -2.784081 | -1.926610 | -0.436965 |
| 41 | 6 | 0 | -3.805708 | -1.472573 | 0.622709  |
| 42 | 6 | 0 | -4.619292 | -0.181861 | 0.477426  |
| 43 | 1 | 0 | -3.237426 | -1.941038 | -1.433135 |
| 44 | 1 | 0 | -2.561251 | -2.975764 | -0.200069 |
| 45 | 1 | 0 | -4.567108 | -2.258999 | 0.713555  |
| 46 | 1 | 0 | -3.338595 | -1.419626 | 1.611540  |
| 47 | 8 | 0 | -5.321441 | 0.197996  | 1.427429  |
| 48 | 7 | 0 | -4.583162 | 0.463262  | -0.707150 |
| 49 | 6 | 0 | -5.325710 | 1.697223  | -0.900759 |
| 50 | 1 | 0 | -3.861794 | 0.225607  | -1.402859 |
| 51 | 1 | 0 | -5.121675 | 2.064507  | -1.908438 |

|    |   |   |           |          |           |
|----|---|---|-----------|----------|-----------|
| 52 | 1 | 0 | -6.401465 | 1.526967 | -0.784862 |
| 53 | 1 | 0 | -5.032470 | 2.462214 | -0.171527 |

---

Fe<sup>3+</sup>

|                                              |                  |
|----------------------------------------------|------------------|
| Zero-point correction=                       | 0.000000 (A. U.) |
| Thermal correction to Energy=                | 0.001416         |
| Thermal correction to Enthalpy=              | 0.002360         |
| Thermal correction to Gibbs Free Energy=     | -0.016342        |
| Sum of electronic and zero-point Energies=   | -1261.266099     |
| Sum of electronic and thermal Energies=      | -1261.264683     |
| Sum of electronic and thermal Enthalpies=    | -1261.263739     |
| Sum of electronic and thermal Free Energies= | -1261.282442     |

SCF Done: E(UB3LYP) = -1262.82741592 A.U.

Cu<sup>2+</sup>

|                                              |                  |
|----------------------------------------------|------------------|
| Zero-point correction=                       | 0.000000 (A. U.) |
| Thermal correction to Energy=                | 0.001416         |
| Thermal correction to Enthalpy=              | 0.002360         |
| Thermal correction to Gibbs Free Energy=     | -0.016509        |
| Sum of electronic and zero-point Energies=   | -1639.251805     |
| Sum of electronic and thermal Energies=      | -1639.250389     |
| Sum of electronic and thermal Enthalpies=    | -1639.249445     |
| Sum of electronic and thermal Free Energies= | -1639.268315     |

SCF Done: E(UB3LYP) = -1639.95476965 A.U.

A:

---

| Center | Atomic | Atomic | Coordinates (Angstroms) |
|--------|--------|--------|-------------------------|
|--------|--------|--------|-------------------------|

| Number | Number | Type | X         | Y         | Z         |
|--------|--------|------|-----------|-----------|-----------|
| 1      | 29     | 0    | 2.895259  | 0.043222  | -0.272100 |
| 2      | 6      | 0    | 0.334837  | 1.067921  | -1.160704 |
| 3      | 8      | 0    | 1.561894  | 1.292634  | -1.437482 |
| 4      | 8      | 0    | -0.646962 | 1.750125  | -1.487337 |
| 5      | 7      | 0    | -3.742445 | -0.689942 | -0.469943 |
| 6      | 8      | 0    | 2.973777  | -1.659055 | -1.273986 |
| 7      | 8      | 0    | 4.256722  | -2.737528 | -2.782654 |
| 8      | 7      | 0    | 1.123570  | -0.460687 | 0.727711  |
| 9      | 7      | 0    | 4.239765  | -0.983801 | 1.411961  |
| 10     | 7      | 0    | 4.715726  | 0.464561  | -1.178038 |
| 11     | 7      | 0    | 3.061639  | 1.706779  | 1.110004  |
| 12     | 6      | 0    | 1.667899  | 1.823569  | 1.626049  |
| 13     | 6      | 0    | 0.998945  | 0.470634  | 1.883373  |
| 14     | 6      | 0    | 1.142430  | -1.900506 | 1.147324  |
| 15     | 6      | 0    | 2.205640  | -2.332543 | 2.172024  |
| 16     | 6      | 0    | 3.679332  | -2.313932 | 1.741468  |
| 17     | 6      | 0    | 5.501513  | -1.108501 | 0.663747  |
| 18     | 6      | 0    | 5.821656  | 0.082904  | -0.256311 |
| 19     | 6      | 0    | 4.784891  | 1.899209  | -1.587735 |
| 20     | 6      | 0    | 4.697921  | 2.928424  | -0.453039 |
| 21     | 6      | 0    | 3.392152  | 2.953567  | 0.350836  |
| 22     | 6      | 0    | 4.061407  | 1.435809  | 2.175925  |
| 23     | 6      | 0    | 4.274355  | -0.055600 | 2.545594  |
| 24     | 6      | 0    | 3.933884  | -1.740277 | -2.143329 |
| 25     | 6      | 0    | 4.684449  | -0.413123 | -2.386441 |
| 26     | 6      | 0    | 0.063974  | -0.244514 | -0.331440 |
| 27     | 6      | 0    | -1.382795 | -0.310452 | 0.189936  |
| 28     | 6      | 0    | -2.354961 | -0.734093 | -0.920820 |
| 29     | 6      | 0    | -4.643368 | 0.320238  | -0.589369 |
| 30     | 6      | 0    | -7.090091 | 0.540627  | 0.300642  |
| 31     | 6      | 0    | -5.765713 | -0.128180 | 0.080769  |



|    |   |   |            |           |           |
|----|---|---|------------|-----------|-----------|
| 32 | 7 | 0 | -5.488159  | -1.375764 | 0.567139  |
| 33 | 7 | 0 | -4.266246  | -1.710355 | 0.237131  |
| 34 | 8 | 0 | -9.787083  | 1.058081  | 1.124953  |
| 35 | 6 | 0 | -12.017715 | 0.368129  | -0.444414 |
| 36 | 6 | 0 | -8.270895  | -0.328947 | -0.158230 |
| 37 | 6 | 0 | -9.620289  | 0.303367  | 0.168509  |
| 38 | 7 | 0 | -10.640783 | -0.041451 | -0.675024 |
| 39 | 1 | 0 | 1.093520   | 2.375158  | 0.882068  |
| 40 | 1 | 0 | 1.651704   | 2.413232  | 2.556022  |
| 41 | 1 | 0 | 1.448905   | -0.003704 | 2.753409  |
| 42 | 1 | 0 | -0.052164  | 0.646332  | 2.141282  |
| 43 | 1 | 0 | 1.286595   | -2.474248 | 0.229139  |
| 44 | 1 | 0 | 0.162359   | -2.167826 | 1.565329  |
| 45 | 1 | 0 | 1.977770   | -3.383787 | 2.390411  |
| 46 | 1 | 0 | 2.064797   | -1.823901 | 3.132452  |
| 47 | 1 | 0 | 4.276929   | -2.803297 | 2.532119  |
| 48 | 1 | 0 | 3.768893   | -2.918909 | 0.836815  |
| 49 | 1 | 0 | 5.434563   | -2.014830 | 0.058885  |
| 50 | 1 | 0 | 6.362865   | -1.242058 | 1.342913  |
| 51 | 1 | 0 | 6.078744   | 0.950872  | 0.347879  |
| 52 | 1 | 0 | 6.720732   | -0.168277 | -0.837719 |
| 53 | 1 | 0 | 3.943957   | 2.058864  | -2.267135 |
| 54 | 1 | 0 | 5.716707   | 2.069677  | -2.149673 |
| 55 | 1 | 0 | 4.767684   | 3.911395  | -0.935486 |
| 56 | 1 | 0 | 5.576682   | 2.880688  | 0.199808  |
| 57 | 1 | 0 | 3.421986   | 3.806307  | 1.048515  |
| 58 | 1 | 0 | 2.566782   | 3.104479  | -0.347527 |
| 59 | 1 | 0 | 3.791630   | 1.980541  | 3.093913  |
| 60 | 1 | 0 | 5.011137   | 1.855553  | 1.848060  |
| 61 | 1 | 0 | 5.229213   | -0.123122 | 3.097537  |
| 62 | 1 | 0 | 3.501133   | -0.359506 | 3.251461  |
| 63 | 1 | 0 | 5.696552   | -0.609625 | -2.758825 |
| 64 | 1 | 0 | 4.128691   | 0.113789  | -3.167959 |

|    |   |   |            |           |           |
|----|---|---|------------|-----------|-----------|
| 65 | 1 | 0 | 0.234142   | -1.063928 | -1.040823 |
| 66 | 1 | 0 | -1.692396  | 0.674734  | 0.550008  |
| 67 | 1 | 0 | -1.481216  | -1.024344 | 1.014742  |
| 68 | 1 | 0 | -2.257686  | -0.058466 | -1.771628 |
| 69 | 1 | 0 | -2.155947  | -1.759090 | -1.246539 |
| 70 | 1 | 0 | -4.417386  | 1.234826  | -1.116309 |
| 71 | 1 | 0 | -7.227431  | 0.772013  | 1.361907  |
| 72 | 1 | 0 | -7.103933  | 1.499365  | -0.228941 |
| 73 | 1 | 0 | -12.532176 | 0.483927  | -1.402064 |
| 74 | 1 | 0 | -12.565068 | -0.357170 | 0.170866  |
| 75 | 1 | 0 | -12.009745 | 1.324725  | 0.080048  |
| 76 | 1 | 0 | -8.219172  | -1.295985 | 0.357615  |
| 77 | 1 | 0 | -8.194955  | -0.542297 | -1.231670 |
| 78 | 1 | 0 | -10.452905 | -0.717359 | -1.400710 |

-----

B.

In solvent: SCF Done: E(UB3LYP) = -3393.91003662 A.U.

Thermal correction to Gibbs Free Energy= 0.595373

Total Gibbs Free Energy in solvent: -3393.31466362

A. U.

Standard orientation:

-----

| Center<br>Number | Atomic<br>Number | Atomic<br>Type | Coordinates (Angstroms) |           |           |
|------------------|------------------|----------------|-------------------------|-----------|-----------|
|                  |                  |                | X                       | Y         | Z         |
| 1                | 29               | 0              | 1.593784                | -0.387657 | 0.059438  |
| 2                | 6                | 0              | 0.713635                | 3.953846  | -0.674084 |
| 3                | 8                | 0              | 1.674486                | 4.347630  | -1.376253 |

-----

|    |   |   |           |           |           |
|----|---|---|-----------|-----------|-----------|
| 4  | 8 | 0 | -0.339527 | 4.542329  | -0.333722 |
| 5  | 7 | 0 | -1.572282 | 1.604428  | 1.693464  |
| 6  | 8 | 0 | 2.392755  | -0.126053 | 1.835493  |
| 7  | 8 | 0 | 2.836011  | -1.181830 | 3.774789  |
| 8  | 7 | 0 | 1.853752  | 1.569775  | -0.628659 |
| 9  | 7 | 0 | 3.602876  | -1.150501 | -0.712254 |
| 10 | 7 | 0 | 1.281140  | -2.371232 | 0.740781  |
| 11 | 7 | 0 | 0.901771  | -0.863046 | -1.884257 |
| 12 | 6 | 0 | 0.634214  | 0.476904  | -2.489043 |
| 13 | 6 | 0 | 1.702962  | 1.489885  | -2.115377 |
| 14 | 6 | 0 | 3.222704  | 2.047259  | -0.219802 |
| 15 | 6 | 0 | 4.428760  | 1.279600  | -0.789187 |
| 16 | 6 | 0 | 4.663689  | -0.174116 | -0.347339 |
| 17 | 6 | 0 | 3.735354  | -2.398477 | 0.063238  |
| 18 | 6 | 0 | 2.421445  | -3.181793 | 0.221896  |
| 19 | 6 | 0 | -0.037898 | -2.954143 | 0.352186  |
| 20 | 6 | 0 | -0.334868 | -2.997871 | -1.149963 |
| 21 | 6 | 0 | -0.375000 | -1.645834 | -1.868939 |
| 22 | 6 | 0 | 1.976959  | -1.602661 | -2.617853 |
| 23 | 6 | 0 | 3.437866  | -1.342793 | -2.158627 |
| 24 | 6 | 0 | 2.289409  | -1.110056 | 2.678728  |
| 25 | 6 | 0 | 1.347950  | -2.238486 | 2.224944  |
| 26 | 6 | 0 | 0.762850  | 2.476118  | -0.086959 |
| 27 | 6 | 0 | 0.751115  | 2.516418  | 1.456375  |
| 28 | 6 | 0 | -0.647324 | 2.705949  | 2.038370  |
| 29 | 6 | 0 | -2.925561 | 1.636982  | 1.733600  |
| 30 | 6 | 0 | -4.710563 | -0.194007 | 1.169811  |
| 31 | 6 | 0 | -3.334581 | 0.372225  | 1.347211  |
| 32 | 7 | 0 | -2.211051 | -0.355243 | 1.086496  |
| 33 | 7 | 0 | -1.148071 | 0.391147  | 1.302525  |
| 34 | 8 | 0 | -6.727451 | -1.881974 | -0.164801 |
| 35 | 6 | 0 | -8.924349 | -0.556302 | -1.260097 |
| 36 | 6 | 0 | -5.284716 | 0.051486  | -0.242043 |

|    |   |   |           |           |           |
|----|---|---|-----------|-----------|-----------|
| 37 | 6 | 0 | -6.601981 | -0.691099 | -0.447221 |
| 38 | 7 | 0 | -7.628733 | 0.041199  | -0.964975 |
| 39 | 1 | 0 | -0.339880 | 0.808616  | -2.123055 |
| 40 | 1 | 0 | 0.557628  | 0.391723  | -3.583245 |
| 41 | 1 | 0 | 2.654290  | 1.200757  | -2.554620 |
| 42 | 1 | 0 | 1.464773  | 2.481291  | -2.512187 |
| 43 | 1 | 0 | 3.253653  | 1.988739  | 0.869512  |
| 44 | 1 | 0 | 3.295918  | 3.095452  | -0.527762 |
| 45 | 1 | 0 | 5.307224  | 1.832032  | -0.431463 |
| 46 | 1 | 0 | 4.482183  | 1.377708  | -1.879102 |
| 47 | 1 | 0 | 5.639999  | -0.507825 | -0.740905 |
| 48 | 1 | 0 | 4.723388  | -0.186848 | 0.742873  |
| 49 | 1 | 0 | 4.115462  | -2.130911 | 1.050751  |
| 50 | 1 | 0 | 4.476677  | -3.078274 | -0.392324 |
| 51 | 1 | 0 | 2.129853  | -3.606743 | -0.737545 |
| 52 | 1 | 0 | 2.607138  | -4.032294 | 0.893689  |
| 53 | 1 | 0 | -0.806237 | -2.345168 | 0.834657  |
| 54 | 1 | 0 | -0.113476 | -3.975585 | 0.757704  |
| 55 | 1 | 0 | -1.344396 | -3.416421 | -1.244034 |
| 56 | 1 | 0 | 0.310737  | -3.713030 | -1.671021 |
| 57 | 1 | 0 | -0.708421 | -1.803699 | -2.907058 |
| 58 | 1 | 0 | -1.118633 | -1.017298 | -1.372915 |
| 59 | 1 | 0 | 1.907379  | -1.373605 | -3.691014 |
| 60 | 1 | 0 | 1.764762  | -2.665406 | -2.523075 |
| 61 | 1 | 0 | 4.048118  | -2.186608 | -2.524839 |
| 62 | 1 | 0 | 3.821989  | -0.456142 | -2.661527 |
| 63 | 1 | 0 | 1.635068  | -3.186089 | 2.695391  |
| 64 | 1 | 0 | 0.350062  | -1.968647 | 2.582626  |
| 65 | 1 | 0 | -0.166573 | 2.010286  | -0.418471 |
| 66 | 1 | 0 | 1.343383  | 3.366025  | 1.813382  |
| 67 | 1 | 0 | 1.200491  | 1.616036  | 1.875549  |
| 68 | 1 | 0 | -0.591472 | 2.759711  | 3.131016  |
| 69 | 1 | 0 | -1.086133 | 3.622224  | 1.636526  |

|    |   |   |           |           |           |
|----|---|---|-----------|-----------|-----------|
| 70 | 1 | 0 | -3.467913 | 2.525535  | 2.018423  |
| 71 | 1 | 0 | -4.681003 | -1.272404 | 1.346622  |
| 72 | 1 | 0 | -5.387263 | 0.236693  | 1.916596  |
| 73 | 1 | 0 | -9.638625 | 0.239884  | -1.478560 |
| 74 | 1 | 0 | -8.867081 | -1.234783 | -2.118616 |
| 75 | 1 | 0 | -9.273964 | -1.129776 | -0.398253 |
| 76 | 1 | 0 | -4.577685 | -0.334092 | -0.986486 |
| 77 | 1 | 0 | -5.394276 | 1.126348  | -0.428445 |
| 78 | 1 | 0 | -7.465310 | 1.003939  | -1.217359 |

-----

Cu(II)

Standard orientation:

-----

| Center | Atomic | Atomic | Coordinates (Angstroms) |           |           |
|--------|--------|--------|-------------------------|-----------|-----------|
| Number | Number | Type   | X                       | Y         | Z         |
| 1      | 29     | 0      | 0.392272                | 0.060332  | 1.232971  |
| 2      | 29     | 0      | -0.391596               | 0.061514  | -1.229075 |
| 3      | 8      | 0      | 2.250513                | 0.164811  | 0.443572  |
| 4      | 8      | 0      | 0.456340                | -1.953091 | 1.034930  |
| 5      | 8      | 0      | 0.250563                | 2.036623  | 1.108569  |
| 6      | 8      | 0      | -1.539214               | -0.059476 | 1.693360  |
| 7      | 8      | 0      | -2.247811               | 0.179409  | -0.443578 |
| 8      | 8      | 0      | -0.469133               | -1.951603 | -1.027329 |
| 9      | 8      | 0      | 1.536375                | -0.072423 | -1.691708 |
| 10     | 8      | 0      | -0.235114               | 2.036796  | -1.106114 |
| 11     | 6      | 0      | -0.005376               | -2.526794 | 0.003069  |
| 12     | 6      | 0      | -2.434261               | 0.054877  | 0.806313  |
| 13     | 6      | 0      | 0.007186                | 2.603046  | 0.001565  |
| 14     | 6      | 0      | 2.433845                | 0.043574  | -0.806588 |
| 15     | 6      | 0      | 3.874414                | 0.070306  | -1.295517 |

|    |   |   |           |           |           |
|----|---|---|-----------|-----------|-----------|
| 16 | 1 | 0 | 3.960755  | -0.434765 | -2.257951 |
| 17 | 1 | 0 | 4.168935  | 1.117469  | -1.423990 |
| 18 | 1 | 0 | 4.536739  | -0.382322 | -0.555789 |
| 19 | 6 | 0 | 0.028845  | -4.047321 | -0.014227 |
| 20 | 1 | 0 | 0.977801  | -4.361899 | -0.462218 |
| 21 | 1 | 0 | -0.022710 | -4.443260 | 1.000836  |
| 22 | 1 | 0 | -0.784336 | -4.441212 | -0.625634 |
| 23 | 6 | 0 | -3.879313 | 0.009255  | 1.280765  |
| 24 | 1 | 0 | -4.248482 | -1.014458 | 1.155888  |
| 25 | 1 | 0 | -3.943909 | 0.279012  | 2.335055  |
| 26 | 1 | 0 | -4.497770 | 0.670227  | 0.670978  |
| 27 | 6 | 0 | -0.028153 | 4.124831  | 0.007549  |
| 28 | 1 | 0 | -1.061164 | 4.438543  | 0.192382  |
| 29 | 1 | 0 | 0.602226  | 4.517038  | 0.806192  |
| 30 | 1 | 0 | 0.279605  | 4.513962  | -0.963898 |
| 31 | 8 | 0 | 1.564322  | -0.377381 | 3.216292  |
| 32 | 1 | 0 | 2.439280  | -0.171163 | 2.855827  |
| 33 | 1 | 0 | 1.485172  | -1.341149 | 3.164010  |
| 34 | 8 | 0 | -1.563775 | -0.373711 | -3.213767 |
| 35 | 1 | 0 | -2.438426 | -0.172456 | -2.849683 |
| 36 | 1 | 0 | -1.480954 | -1.337401 | -3.166384 |

-----

Fe(III)

Standard orientation:

| Center | Atomic | Atomic | Coordinates (Angstroms) |           |           |
|--------|--------|--------|-------------------------|-----------|-----------|
| Number | Number | Type   | X                       | Y         | Z         |
| 1      | 26     | 0      | 1.498038                | -0.987987 | -0.095310 |
| 2      | 26     | 0      | 0.102420                | 1.774504  | 0.078606  |
| 3      | 8      | 0      | 0.010070                | -0.010085 | -0.004283 |

|    |    |   |           |           |           |
|----|----|---|-----------|-----------|-----------|
| 4  | 26 | 0 | -1.588943 | -0.817356 | 0.011742  |
| 5  | 8  | 0 | 1.246109  | 2.000368  | -1.507537 |
| 6  | 8  | 0 | -0.990852 | 1.972816  | 1.679417  |
| 7  | 8  | 0 | 1.670622  | 1.929463  | 1.229632  |
| 8  | 8  | 0 | -1.453150 | 2.181067  | -1.082545 |
| 9  | 8  | 0 | -2.535997 | 0.391372  | 1.253696  |
| 10 | 8  | 0 | -2.349044 | 0.162634  | -1.516850 |
| 11 | 8  | 0 | -1.190894 | -2.256219 | -1.249657 |
| 12 | 8  | 0 | -1.215353 | -1.955114 | 1.545338  |
| 13 | 8  | 0 | 0.910979  | -2.495240 | 1.043389  |
| 14 | 8  | 0 | 1.004493  | -1.976463 | -1.689685 |
| 15 | 8  | 0 | 2.560075  | 0.187879  | -1.236793 |
| 16 | 8  | 0 | 2.355733  | -0.203472 | 1.494677  |
| 17 | 6  | 0 | 2.256607  | 1.280488  | -1.789982 |
| 18 | 6  | 0 | -0.159132 | -2.623608 | 1.718581  |
| 19 | 6  | 0 | -2.072448 | 1.367884  | 1.922774  |
| 20 | 6  | 0 | -2.226845 | 1.405948  | -1.721713 |
| 21 | 6  | 0 | -0.137988 | -2.472405 | -1.920414 |
| 22 | 6  | 0 | 2.360637  | 1.032737  | 1.791308  |
| 23 | 6  | 0 | 3.253511  | 1.471207  | 2.933976  |
| 24 | 1  | 0 | 4.053901  | 0.749762  | 3.106647  |
| 25 | 1  | 0 | 3.664077  | 2.462657  | 2.731130  |
| 26 | 1  | 0 | 2.644717  | 1.543438  | 3.842096  |
| 27 | 6  | 0 | 3.194689  | 1.796718  | -2.862283 |
| 28 | 1  | 0 | 3.668537  | 0.963442  | -3.383954 |
| 29 | 1  | 0 | 2.658151  | 2.436878  | -3.565211 |
| 30 | 1  | 0 | 3.981478  | 2.393130  | -2.385764 |
| 31 | 6  | 0 | -2.884014 | 1.830753  | 3.114566  |
| 32 | 1  | 0 | -3.931684 | 1.954203  | 2.825826  |
| 33 | 1  | 0 | -2.846131 | 1.059798  | 3.891420  |
| 34 | 1  | 0 | -2.489110 | 2.766505  | 3.511400  |
| 35 | 6  | 0 | -3.061653 | 2.026401  | -2.823117 |
| 36 | 1  | 0 | -3.777742 | 1.307895  | -3.223433 |

|    |   |   |           |           |           |
|----|---|---|-----------|-----------|-----------|
| 37 | 1 | 0 | -3.586595 | 2.905723  | -2.438750 |
| 38 | 1 | 0 | -2.399121 | 2.364192  | -3.626721 |
| 39 | 6 | 0 | -0.264454 | -3.395507 | -3.115197 |
| 40 | 1 | 0 | -0.752663 | -2.851639 | -3.931460 |
| 41 | 1 | 0 | 0.717684  | -3.732112 | -3.449581 |
| 42 | 1 | 0 | -0.898063 | -4.248884 | -2.860949 |
| 43 | 6 | 0 | -0.153556 | -3.660675 | 2.821810  |
| 44 | 1 | 0 | -1.147284 | -3.764589 | 3.258214  |
| 45 | 1 | 0 | 0.180515  | -4.621782 | 2.420009  |
| 46 | 1 | 0 | 0.559878  | -3.360684 | 3.596315  |
| 47 | 8 | 0 | 0.172691  | 3.854136  | 0.032942  |
| 48 | 1 | 0 | -0.600176 | 4.020118  | -0.533016 |
| 49 | 8 | 0 | 3.211369  | -2.166756 | -0.058925 |
| 50 | 1 | 0 | 2.875840  | -2.888443 | 0.500494  |
| 51 | 8 | 0 | -3.472451 | -1.707321 | 0.033933  |
| 52 | 1 | 0 | -3.788367 | -1.584855 | -0.874371 |
| 53 | 1 | 0 | 0.948292  | 4.013180  | -0.527691 |
| 54 | 1 | 0 | 3.809008  | -1.650415 | 0.503782  |
| 55 | 1 | 0 | -3.951823 | -1.067873 | 0.586737  |

- 
1. Frisch, M. J.; *Gaussian 09, revision C. 01*; Gaussian, Inc.: Wallingford, CT, **2010**.
  2. (a) Becke, A. D. *J. Chem. Phys.* **1993**, *98*, 5648–5652. (b) Lee, C.; Yang, W.; Parr, R. G. *Phys. Rev. B* **1988**, *37*, 785–789.
  3. (a) Barone, V.; Cossi, M. *J. Phys. Chem. A* **1998**, *102*, 1995–2001. (b) M Cossi, M.; Rega, N.; Scalmani, G.; Barone, V. *J. Comput. Chem.* **2003**, *24*, 669–681.
